# Supplementary material for: Investigating Attitudes, Motivations and Key Influencers for COVID-19 Vaccination Uptake among Late Adopters in Urban Zimbabwe
Source: MDPI journal article supplement (doi:10.3390/vaccines11020411), 2023-02-10
Supplement: s1 [file s1]

**Table S1.** Perceived confidence in safety of COVID-19 vaccines. Participants indicating that they strongly agree with the statement ‘In general, COVID-19 vaccines are safe’.

| Safety                           |                  |             |                      |         |                      |         |
|----------------------------------|------------------|-------------|----------------------|---------|----------------------|---------|
| Variable                         | Category         | Frequency   | Univariate           |         | Multivariate         |         |
|                                  |                  |             | OR (95% CI)          | p-value | OR (95% CI)          | p-value |
| Gender                           | Male             | 508 (50.0%) | 1                    |         |                      |         |
|                                  | Female           | 508 (50.0%) | 1.101 (0.839, 1.446) | 0.487   |                      |         |
| Age                              | 18-25            | 368 (36.2%) | 1                    |         |                      |         |
|                                  | 26-39            | 409 (40.3%) | 1.16 (0.85, 1.583)   | 0.349   |                      |         |
|                                  | ≥40              | 239 (23.5%) | 1.147 (0.8, 1.644)   | 0.456   |                      |         |
| Education                        | Primary*         | 89 (8.8%)   | 1                    |         |                      |         |
|                                  | Lower Secondary  | 735 (72.4%) | 0.503 (0.278, 0.91)  | 0.023   |                      |         |
|                                  | Higher Secondary | 117 (11.5%) | 0.404 (0.202, 0.805) | 0.01    |                      |         |
|                                  | Tertiary         | 74 (7.3%)   | 0.159 (0.076, 0.33)  | <0.001  |                      |         |
|                                  |                  |             |                      |         |                      |         |
| Economic Status                  | High             | 172 (16.9%) | 1                    |         |                      |         |
|                                  | Middle           | 598 (58.9%) | 1.188 (0.827, 1.708) | 0.351   |                      |         |
|                                  | Low              | 246 (24.2%) | 1.643 (1.065, 2.537) | 0.025   |                      |         |
| Personal Covid Experience        | No               | 428 (42.1%) | 1                    |         |                      |         |
|                                  | Yes              | 588 (57.9%) | 1.275 (0.965, 1.686) | 0.087   |                      |         |
| HIV                              | Negative         | 126 (12.4%) | 1                    |         |                      |         |
|                                  | Positive         | 890 (87.6%) | 1.812 (1.135, 2.891) | 0.013   | 1.71 (1.068, 2.738)  | 0.025   |
| Internet use in the last 30 days | No               | 420 (41.4%) | 1                    |         |                      |         |
|                                  | Yes              | 594 (58.6%) | 0.697 (0.529, 0.917) | 0.01    | 0.722 (0.548, 0.953) | 0.021   |

**Table S2.** Perceived confidence in vaccine effectiveness. Participants responding that they strongly agree with the statement ‘I am confident that COVID-19 vaccines are effective in preventing the disease’.

| Effectiveness                    |                  |             |                      |         |                      |         |
|----------------------------------|------------------|-------------|----------------------|---------|----------------------|---------|
| Variable                         | Category         | Frequency   | Univariate           |         | Multivariate         |         |
|                                  |                  |             | OR (95% CI)          | p-value | OR (95% CI)          | p-value |
| Gender                           | Male             | 508 (50.0%) | 1                    |         |                      |         |
|                                  | Female           | 508 (50.0%) | 1.213 (0.930, 1.582) | 0.155   |                      |         |
| Age                              | 18-25            | 368 (36.2%) | 1                    |         |                      |         |
|                                  | 26-39            | 409 (40.3%) | 1.429 (1.057, 1.933) | 0.02    |                      |         |
|                                  | ≥40              | 239 (23.5%) | 1.501 (1.053, 2.139) | 0.025   |                      |         |
| Education                        | Primary*         | 89 (8.8%)   | 1                    |         |                      |         |
|                                  | Lower Secondary  | 735 (72.4%) | 0.503 (0.283, 0.897) | 0.02    |                      |         |
|                                  | Higher Secondary | 117 (11.5%) | 0.291 (0.15, 0.567)  | <0.001  |                      |         |
|                                  | Tertiary         | 74 (7.3%)   | 0.146 (0.071, 0.301) | <0.001  |                      |         |
| Economic Status                  | High             | 172 (16.9%) | 1                    |         |                      |         |
|                                  | Middle           | 598 (58.9%) | 1.952 (1.286, 2.961) | 0.002   |                      |         |
|                                  | Low              | 246 (24.2%) | 1.556 (1.096, 2.209) | 0.013   |                      |         |
| Personal Covid Experience        | No               | 428 (42.1%) | 1                    |         |                      |         |
|                                  | Yes              | 588 (57.9%) | 1.481 (1.126, 1.948) | 0.005   | 1.474 (1.118, 1.945) | 0.006   |
| HIV                              | Negative         | 126 (12.4%) | 1                    |         |                      |         |
|                                  | Positive         | 890 (87.6%) | 1.772 (1.132, 2.774) | 0.012   | 1.677 (1.065, 2.64)  | 0.026   |
| Internet use in the last 30 days | No               | 420 (41.4%) | 1                    |         |                      |         |
|                                  | Yes              | 594 (58.6%) | 0.584 (0.446, 0.764) | <0.001  | 0.613 (0.467, 0.804) | <0.001  |

**Table S3.** Perceived government trust. Participants indicating that they strongly agree with the statement ‘I am confident that my country’s regulation process approved the COVID-19 vaccine, only when it was shown to be safe.’

| Trust in Regulatory              |                  |             |                      |         |                      |         |
|----------------------------------|------------------|-------------|----------------------|---------|----------------------|---------|
| Variable                         | Category         | Frequency   | Univariate           |         | Multivariate         |         |
|                                  |                  |             | OR (95% CI)          | p-value | OR (95% CI)          | p-value |
| Gender                           | Male             | 508 (50.0%) | 1                    |         |                      |         |
|                                  | Female           | 508 (50.0%) | 1.168 (0.889, 1.535) | 0.266   |                      |         |
| Age                              | 18-25            | 368 (36.2%) | 1                    |         |                      |         |
|                                  | 26-39            | 409 (40.3%) | 1.418 (1.040, 1.935) | 0.027   |                      |         |
|                                  | ≥40              | 239 (23.5%) | 1.399 (0.974, 2.008) | 0.069   |                      |         |
| Education                        | Primary          | 89 (8.8%)   | 1                    |         |                      |         |
|                                  | Lower Secondary  | 735 (72.4%) | 0.932 (0.555, 1.562) | 0.788   |                      |         |
|                                  | Higher Secondary | 117 (11.5%) | 0.551 (0.297, 1.023) | 0.059   |                      |         |
|                                  | Tertiary         | 74 (7.3%)   | 0.235 (0.12, 0.461)  | <0.001  |                      |         |
| Economic Status                  | High             | 172 (16.9%) | 1                    |         |                      |         |
|                                  | Middle           | 598 (58.9%) | 1.307 (0.913, 1.87)  | 0.143   |                      |         |
|                                  | Low              | 246 (24.2%) | 2.154 (1.387, 3.346) | 0.001   |                      |         |
| Personal Covid Experience        | No               | 428 (42.1%) | 1                    |         |                      |         |
|                                  | Yes              | 588 (57.9%) | 1.39 (1.049, 1.841)  | 0.022   | 1.374 (1.034, 1.825) | 0.028   |
| HIV                              | Negative         | 126 (12.4%) | 1                    |         |                      |         |
|                                  | Positive         | 890 (87.6%) | 1.899 (1.182, 3.051) | 0.008   | 1.79 (1.108, 2.891)  | 0.017   |
| Internet use in the last 30 days | No               | 420 (41.4%) | 1                    |         |                      |         |
|                                  | Yes              | 594 (58.6%) | 0.608 (0.461, 0.801) | <0.001  | 0.639 (0.484, 0.845) | 0.002   |

**Table S4.** Primary sources of media information: Radio

| Radio                            |                  |             |                      |         |                      |         |
|----------------------------------|------------------|-------------|----------------------|---------|----------------------|---------|
| Variable                         | Category         | Frequency   | Univariate           |         | Multivariate         |         |
|                                  |                  |             | OR (95% CI)          | p-value | OR (95% CI)          | p-value |
| Gender                           | Male             | 508 (50.0%) | 1                    |         |                      |         |
|                                  | Female           | 508 (50.0%) | 0.951 (0.663, 0.363) | 0.783   |                      |         |
| Age                              | 18-25            | 368 (36.2%) | 1                    |         |                      |         |
|                                  | 26-39            | 409 (40.3%) | 1.783 (1.167, 2.725) | 0.007   | 1.846 (1.199, 2.843) | 0.005   |
|                                  | ≥40              | 239 (23.5%) | 1.158 (0.737, 1.819) | 0.524   | 1.292(0.795, 2.1)    | 0.301   |
|                                  |                  |             |                      |         |                      |         |
| Education                        | Primary          | 89 (8.8%)   | 1                    |         |                      |         |
|                                  | Lower Secondary  | 735 (72.4%) | 2.254 (1.29, 3.939)  | 0.004   | 2.318(1.29, 4.164)   | 0.005   |
|                                  | Higher Secondary | 117 (11.5%) | 1.493 (0.731, 3.048) | 0.271   | 1.624(0.762, 3.458)  | 0.209   |
|                                  | Tertiary         | 74 (7.3%)   | 0.685 (0.335, 1.402) | 0.3     | 0.685(0.326, 1.443)  | 0.32    |
| Economic Status                  | High             | 172 (16.9%) | 1                    |         |                      |         |
|                                  | Middle           | 598 (58.9%) | 1.241 (0.772, 1.996) | 0.372   |                      |         |
|                                  | Low              | 246 (24.2%) | 1.245 (0.716, 2.167) | 0.438   |                      |         |
| Personal Covid Experience        | No               | 428 (42.1%) | 1                    |         |                      |         |
|                                  | Yes              | 588 (57.9%) | 1.179 (0.815, 1.705) | 0.381   |                      |         |
| HIV                              | Negative         | 126 (12.4%) | 1                    |         |                      |         |
|                                  | Positive         | 890 (87.6%) | 1.176 (0.663, 2.083) | 0.58    |                      |         |
| Internet use in the last 30 days | No               | 420 (41.4%) | 1                    |         |                      |         |
|                                  | Yes              | 594 (58.6%) | 1.101 (0.762, 1.591) | 0.609   |                      |         |

**Table S5.** Primary sources of media information: Television

| Television                       |                  |             |                      |         |                      |         |
|----------------------------------|------------------|-------------|----------------------|---------|----------------------|---------|
| Variable                         | Category         | Frequency   | Univariate           |         | Multivariate         |         |
|                                  |                  |             | OR (95% CI)          | p-value | OR (95% CI)          | p-value |
| Gender                           | Male             | 508 (50.0%) | 1                    |         |                      |         |
|                                  | Female           | 508 (50.0%) | 0.811 (0.606, 1.086) | 0.159   |                      |         |
| Age                              | 18-25            | 368 (36.2%) | 1                    |         |                      |         |
|                                  | 26-39            | 409 (40.3%) | 1.008 (0.722, 1.406) | 0.963   |                      |         |
|                                  | ≥40              | 239 (23.5%) | 0.997 (0.678, 1.464) | 0.986   |                      |         |
| Education                        | Primary          | 89 (8.8%)   | 1                    |         |                      |         |
|                                  | Lower Secondary  | 735 (72.4%) | 2.458 (1.558, 3.877) | <0.001  | 2.222 (1.386, 3.56)  | 0.001   |
|                                  | Higher Secondary | 117 (11.5%) | 4.186 (2.153, 8.138) | <0.001  | 2.719 (1.35, 5.475)  | 0.005   |
|                                  | Tertiary         | 74 (7.3%)   | 2.214 (1.124, 4.361) | 0.022   | 1.203 (0.578, 2.505) | 0.621   |
| Economic Status                  | High             | 172 (16.9%) | 1                    |         |                      |         |
|                                  | Middle           | 598 (58.9%) | 0.734 (0.465, 1.159) | 0.185   | 0.737 (0.461, 1.178) | 0.202   |
|                                  | Low              | 246 (24.2%) | 0.328 (0.202, 0.534) | <0.001  | 0.339 (0.203, 0.567) | <0.001  |
| Personal Covid Experience        | No               | 428 (42.1%) | 1                    |         |                      |         |
|                                  | Yes              | 588 (57.9%) | 0.89 (0.664, 1.194)  | 0.438   |                      |         |
| HIV                              | Negative         | 126 (12.4%) | 1                    |         |                      |         |
|                                  | Positive         | 890 (87.6%) | 0.729 (0.481, 1.107) | 0.138   |                      |         |
| Internet use in the last 30 days | No               | 420 (41.4%) | 1                    |         |                      |         |
|                                  | Yes              | 594 (58.6%) | 1.813 (1.33, 2.472)  | <0.001  | 1.528 (1.089, 2.144) | 0.014   |

**Table S6.** Primary sources of media information: Whatsapp

| Television                       |                  |             |                       |         |                      |         |
|----------------------------------|------------------|-------------|-----------------------|---------|----------------------|---------|
| Variable                         | Category         | Frequency   | Univariate            |         | Multivariate         |         |
|                                  |                  |             | OR (95% CI)           | p-value | OR (95% CI)          | p-value |
| Gender                           | Male             | 508 (50.0%) | 1                     |         |                      |         |
|                                  | Female           | 508 (50.0%) | 0.904 (0.702, 1.166)  | 0.438   |                      |         |
| Age                              | 18-25            | 368 (36.2%) | 1                     |         |                      |         |
|                                  | 26-39            | 409 (40.3%) | 0.866 (0.641, 1.168)  | 0.345   |                      |         |
|                                  | ≥40              | 239 (23.5%) | 0.413 (0.295, 0.578)  | <0.001  |                      |         |
| Education                        | Primary          | 89 (8.8%)   | 1                     |         |                      |         |
|                                  | Lower Secondary  | 735 (72.4%) | 3.708 (2.314, 5.944)  | <0.001  | 2.92 (1.796, 4.747)  | <0.001  |
|                                  | Higher Secondary | 117 (11.5%) | 5.545 (3.038, 10.124) | <0.001  | 2.74 (1.446, 5.193)  | 0.002   |
|                                  | Tertiary         | 74 (7.3%)   | 6.778 (3.385, 13.572) | <0.001  | 2.828 (1.347, 5.935) | 0.006   |
| Economic Status                  | High             | 172 (16.9%) | 1                     |         |                      |         |
|                                  | Middle           | 598 (58.9%) | 0.783 (0.543, 1.129)  | 0.191   | 0.91 (0.616, 1.343)  | 0.635   |
|                                  | Low              | 246 (24.2%) | 0.462 (0.307, 0.697)  | <0.001  | 0.615 (0.394, 0.96)  | 0.032   |
| Personal Covid Experience        | No               | 428 (42.1%) | 1                     |         |                      |         |
|                                  | Yes              | 588 (57.9%) | 0.914 (0.707, 1.181)  | 0.493   |                      |         |
| HIV                              | Negative         | 126 (12.4%) | 1                     |         |                      |         |
|                                  | Positive         | 890 (87.6%) | 0.786 (0.538, 1.147)  | 0.211   |                      |         |
| Internet use in the last 30 days | No               | 420 (41.4%) | 1                     |         |                      |         |
|                                  | Yes              | 594 (58.6%) | 3.747 (2.819, 4.982)  | <0.001  | 3.253 (2.399, 4.41)  | <0.001  |

**Table S7.** Primary sources of media information: Facebook

| Television                       |                  |             |                       |         |                      |         |
|----------------------------------|------------------|-------------|-----------------------|---------|----------------------|---------|
| Variable                         | Category         | Frequency   | Univariate            |         | Multivariate         |         |
|                                  |                  |             | OR (95% CI)           | p-value | OR (95% CI)          | p-value |
| Gender                           | Male             | 508 (50.0%) | 1                     |         |                      |         |
|                                  | Female           | 508 (50.0%) | 0.627 (0.486, 0.81)   | <0.001  | 0.741 (0.56, 0.982)  | 0.037   |
| Age                              | 18-25            | 368 (36.2%) | 1                     |         |                      |         |
|                                  | 26-39            | 409 (40.3%) | 0.731 (0.55, 0.972)   | 0.031   | 0.962 (0.707, 1.307) | 0.803   |
|                                  | ≥40              | 239 (23.5%) | 0.217 (0.146, 0.324)  | <0.001  | 0.297 (0.195, 0.453) | <0.001  |
| Education                        | Primary          | 89 (8.8%)   | 1                     |         |                      |         |
|                                  | Lower Secondary  | 735 (72.4%) | 4.045 (2.114, 7.741)  | <0.001  |                      |         |
|                                  | Higher Secondary | 117 (11.5%) | 6.736 (3.253, 13.95)  | <0.001  |                      |         |
|                                  | Tertiary         | 74 (7.3%)   | 8.342 (3.826, 18.188) | <0.001  |                      |         |
| Economic Status                  | High             | 172 (16.9%) | 1                     |         |                      |         |
|                                  | Middle           | 598 (58.9%) | 0.545 (0.387, 0.767)  | <0.001  | 0.605 (0.419, 0.875) | 0.008   |
|                                  | Low              | 246 (24.2%) | 0.268 (0.176, 0.409)  | <0.001  | 0.372 (0.236, 0.586) | <0.001  |
| Personal Covid Experience        | No               | 428 (42.1%) | 1                     |         |                      |         |
|                                  | Yes              | 588 (57.9%) | 1.054 (0.814, 1.364)  | 0.69    |                      |         |
| HIV                              | Negative         | 126 (12.4%) | 1                     |         |                      |         |
|                                  | Positive         | 890 (87.6%) | 0.518 (0.338, 0.794)  | 0.003   |                      |         |
| Internet use in the last 30 days | No               | 420 (41.4%) | 1                     |         |                      |         |
|                                  | Yes              | 594 (58.6%) | 3.783 (2.892, 4.948)  | <0.001  | 3.029 (2.281, 4.021) | <0.001  |
